# Supplementary material for: Inflammatory but not apoptotic death of granulocytes citrullinates fibrinogen
Source: PubMed Central journal article supplement (PMC4704541; doi:10.1186/s13075-015-0890-0), 2015-12-17

Additional File 2: FACS staining of ATRA/HL60 cells treated with staurosporine

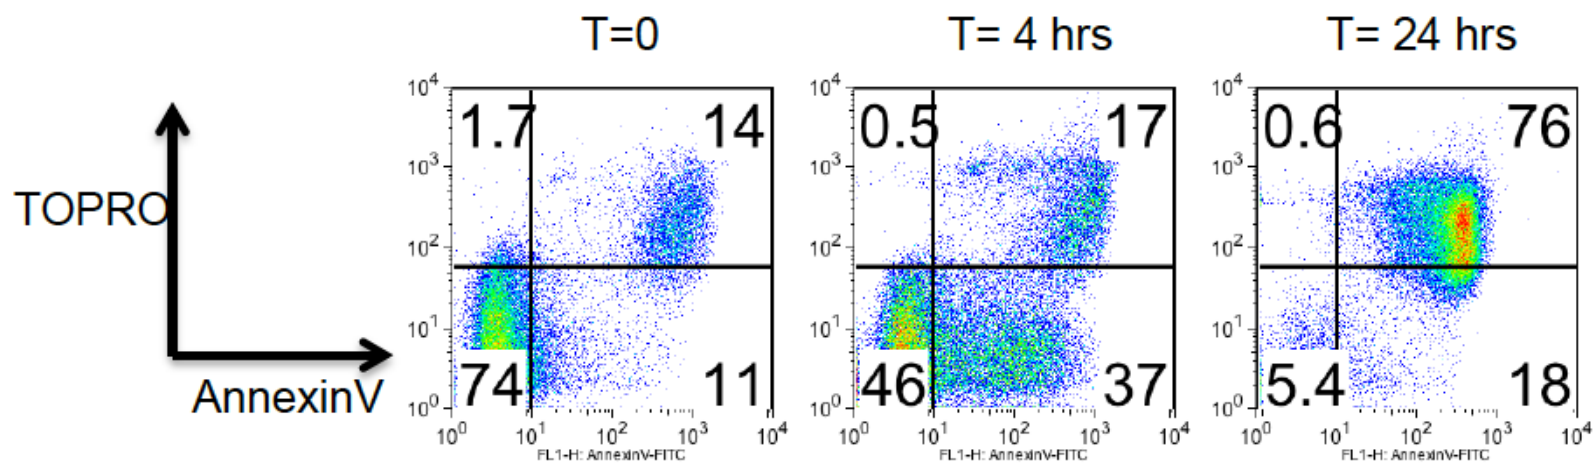

Supplement: 13075_2015_890_MOESM2_ESM.pdf [file 13075_2015_890_MOESM2_ESM.pdf]
